# Supplementary material for: Geospatial modelling reveals flood-driven inequities in nutrition-sensitive healthcare access across Kampala, Uganda
Source: Research Square preprint supplement (doi:10.21203/rs.3.rs-8055572/v1), 2025-12-03

20 mm / 1 hr

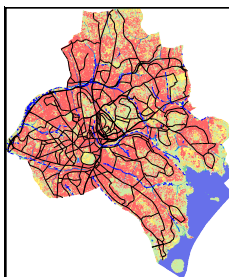

20 mm / 3 hr

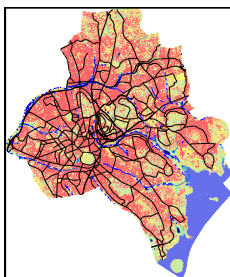

20 mm / 6 hr

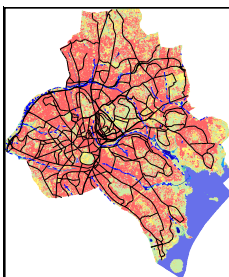

40 mm / 1 hr

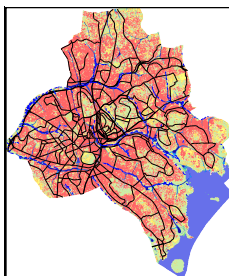

40 mm / 3 hr

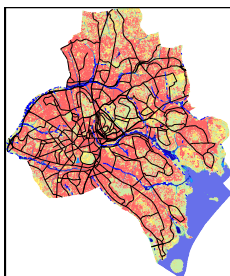

40 mm / 6 hr

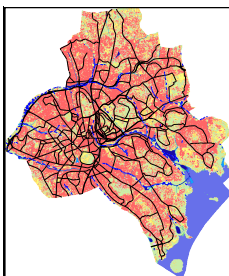

60 mm / 1 hr

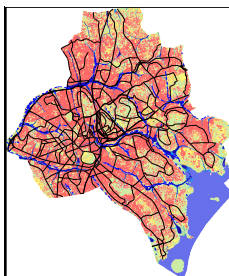

60 mm / 3 hr

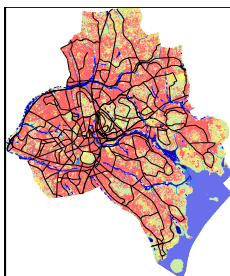

60 mm / 6 hr

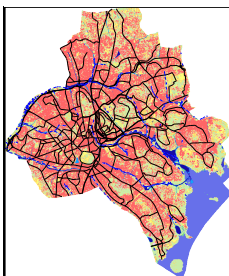

80 mm / 1 hr

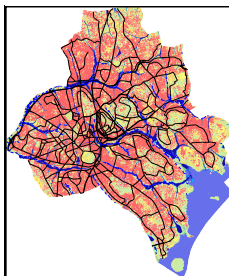

80 mm / 3 hr

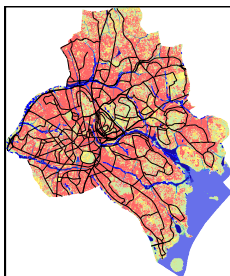

80 mm / 6 hr

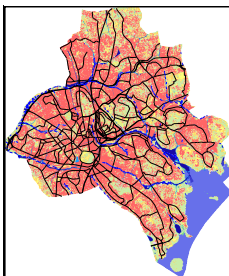

100 mm / 1 hr

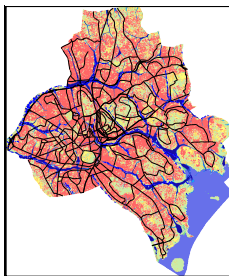

100 mm / 3 hr

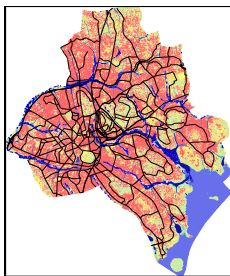

100 mm / 6 hr

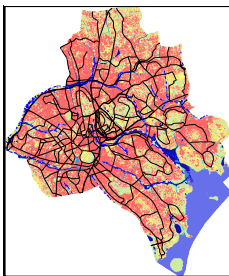

### Merged land-cover, barriers and floods

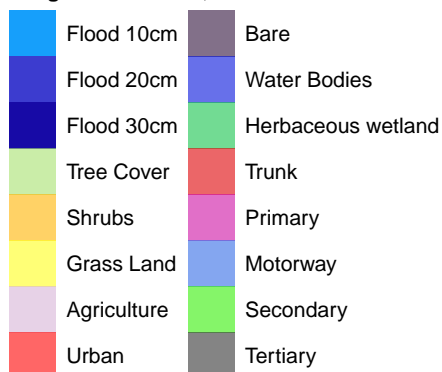

Supplement: Supplementary file 1 [file f2b23fca8e0da91aa7f31c21.pdf]
