# Supplementary material for: Geospatial modelling reveals flood-driven inequities in nutrition-sensitive healthcare access across Kampala, Uganda
Source: Research Square preprint supplement (doi:10.21203/rs.3.rs-8055572/v1), 2025-12-03
Supplement: Supplementary file 1 [file 574053f60d781d3de3e23f21.docx]

**Supplementary Methods 2: Nutrition-sensitive vulnerability index indicators**

Sources: WorldPop zero-dose vulnerability index indicator rasters (Utazi et al., 2023; DOI: 10.5258/SOTON/WP00767) for Uganda, 1000 m, 2016, and Malaria Atlas Project PfPR2–10 (Weiss et al., 2019, The Lancet)

| **Domain** | **Indicator** | **Definition from source** |
| --- | --- | --- |
| Maternal service contact | No antenatal care (ANC) among mothers | Proportion of children aged 12–23 months born to mothers who did not attend ANC, 2016. |
| Maternal service contact | No postnatal care (PNC) among mothers | Proportion of children aged 12–23 months born to mothers who did not receive, or do not recall, PNC within 2 months after birth, 2016. |
| Maternal service contact | No tetanus toxoid before birth (TT) | Proportion of children aged 12–23 months born to mothers who had no tetanus toxoid injections before birth, 2016. |
| Maternal service contact | No health insurance | Proportion of children aged 12–23 months born to mothers who had no health insurance, 2016. |
| Child health risk and protection | Not delivered by a skilled birth attendant, SBA | Proportion of children aged 12–23 months who were not delivered by a skilled birth attendant, 2016. |
| Child health risk and protection | Underweight prevalence among children | Proportion of children aged 12–23 months who were underweight, 2016. |
| Child health risk and protection | Vaccination coverage, DTP1 | Proportion of children aged 12–23 months who received DTP1, 2016 |
| Child health risk and protection | Vaccination coverage, DTP3 | Proportion of children aged 12–23 months who received DTP3, 2016 |
| Child health risk and protection | Vaccination coverage, MCV1 | Proportion of children aged 12–23 months who received measles vaccine dose 1, 2016 |
| Health | Malaria prevalence, P. falciparum parasite rate in 2–10 year-olds (PfPR2–10) | Proportion of children aged 2–10 years with detectable P. falciparum parasitaemia; global surfaces at ~5×5 km for 2000–2017, use 2016 for alignment. |
| Socioeconomic position and agency | Children in poorest households | Proportion of children aged 12–23 months born to the poorest or poorer households per DHS or MICS-NICS classifications, 2016. |
| Socioeconomic position and agency | Mothers with no formal education | Proportion of children aged 12–23 months born to mothers who had no formal education, 2016. |
| Socioeconomic position and agency | Large household size, ≥9 members | Proportion of children aged 12–23 months born to large households, ≥9 members, 2016. |
| Socioeconomic position and agency | Women not participating in household decision-making | Proportion of women aged 15–49 years who did not participate in decision-making in their households, 2016. |
