# Supplementary material for: Geospatial modelling reveals flood-driven inequities in nutrition-sensitive healthcare access across Kampala, Uganda
Source: Research Square preprint supplement (doi:10.21203/rs.3.rs-8055572/v1), 2025-12-03
Supplement: Supplementary file 2 [file 594fe4f0df1a3e45ec038871.docx]

**Supplementary Methods 1** – **Calculations of population weighted delta travel time**

1. **Per-cell change in travel time**

Difference in minutes between scenario and baseline travel times for raster cell iii, computed only for cells with finite values in both rasters.

1. **Per-cell weighted contribution**

Multiply the per-cell change by the cell population to obtain the contribution in person-minutes.

1. **Parish-level numerator, sum of weighted contributions**

Sum person-minutes over the eligible cells within parish.

1. **Parish-level denominator, total population across the same cells**

Sum the population counts over the same set of cells to provide the normalization factor.

1. **Parish-level population-weighted mean delta travel time, base formula**

Average change in minutes per person for parish

**Example:**
If a cell’s travel time increased by 20 minutes and 50 people lived in that cell, its weighted delta would be 1,000 person-minutes. If the total across a parish sum to 150,000 person-minutes and the parish population is 5,000, the average weighted delta travel time would be 30 minutes, meaning each resident experienced an average 30-minute increase in access time.
