# Supplementary material for: Geospatial modelling reveals flood-driven inequities in nutrition-sensitive healthcare access across Kampala, Uganda
Source: Research Square preprint supplement (doi:10.21203/rs.3.rs-8055572/v1), 2025-12-03
Supplement: Supplementary file 3 [file f0ce6bcddb7cc7b5a1c3b811.docx]

**Supplementary Table 1 – Description of datasets**

| **Name dataset** | **Producer** | **Resolution** | **Year** | **Citation** |
| --- | --- | --- | --- | --- |
| Public/PNFP healthcare facilities | KEMRI–Wellcome Trust Research Programme, compiled from national Master Facility Lists | Point locations | 2019 | 1 |
| Kampala flood extents | UK Centre for Ecology & Hydrology with Makerere University | Vector polygons, modelled on 5 m DEM | 2021 | 2 |
| ESA WorldCover 10 m 2021 v200 | European Space Agency WorldCover Consortium | 10 m | 2022 | 3 |
| Digital Elevation Model, SRTM 1‑arc‑second | NASA, NGA, USGS; regional mosaic via RCMRD GMES Geoportal | 30 m | 2018 | 4 |
| OSM Road network | OpenStreetMap contributors, extracted via HOT Export Tool | Vector lines | 2025-01-08 extract | OpenStreetMap data extract, 08‑01‑2025, ODbL 1.0, 5 |
| OSM Rivers, streams, canals, water features | OpenStreetMap contributors | Vector lines and polygons | 2025‑01‑08 extract | OpenStreetMap data extract, 08‑01‑2025, ODbL 1.0, 5 |
| Parish administrative boundaries | Uganda Bureau of Statistics and partners, via HDX | Vector polygons | 2018 | 6 |
| WorldPop developmental indicators | WorldPop, University of Southampton | 1 km | 2016 | 7 |
| WorldPop population counts, UN‑adjusted, constrained to buildings | WorldPop, University of Southampton | 100 m | 2020 | 8 |
| Malaria prevalence, Plasmodium falciparum | Malaria Atlas Project | ≈5 km | 2017 | 9 |

1. Maina, J. *et al.* A spatial database of health facilities managed by the public health sector in sub Saharan Africa. *Scientific Data* **6**, 134–134 (2019).

2. McClean, F., Walsh, C., Lwasa, S. & Ddumba, D. Modelled flood extents for Kampala, Uganda. NERC EDS Environmental Information Data Centre https://doi.org/10.5285/E53DEA2E-CB25-4F0F-B5F9-937EECF15AFF (2021).

3. Zanaga, D. *et al.* ESA WorldCover 10 m 2021 v200. Zenodo (2022).

4. Regional Centre for Mapping of Resource for Development. Uganda SRTM DEM 30 meters. (2018).

5. OpenStreetMap contributors. Planet dump retrieved from https://planet.osm.org. (2017).

6. Uganda Bureau of Statistics. Uganda administrative boundaries. (2019).

7. Utazi, C. E. *et al.* A zero-dose vulnerability index for equity assessment and spatial prioritization in low- and middle-income countries. *Spatial Statistics* **57**, 100772 (2023).

8. Bondarenko, M., Kerr, D., Sorichetta, A., Tatem, A., & WorldPop,. Census/projection-disaggregated gridded population datasets, adjusted to match the corresponding UNPD 2020 estimates, for 51 countries across sub-Saharan Africa using building footprints. University of Southampton https://doi.org/10.5258/SOTON/WP00683 (2020).

9. Weiss, D. J. *et al.* Mapping the global prevalence, incidence, and mortality of Plasmodium falciparum, 2000-17: a spatial and temporal modelling study. *Lancet* **394**, 322–331 (2019).
